# Supplementary material for: Diabetic phenotype in mouse and humans reduces the number of microglia around β-amyloid plaques
Source: PubMed Central journal article supplement (PMC7653710; doi:10.1186/s13024-020-00415-2), 2020-11-10
Supplement: 13024_2020_415_MOESM1_ESM.pdf [file 13024_2020_415_MOESM1_ESM.pdf]

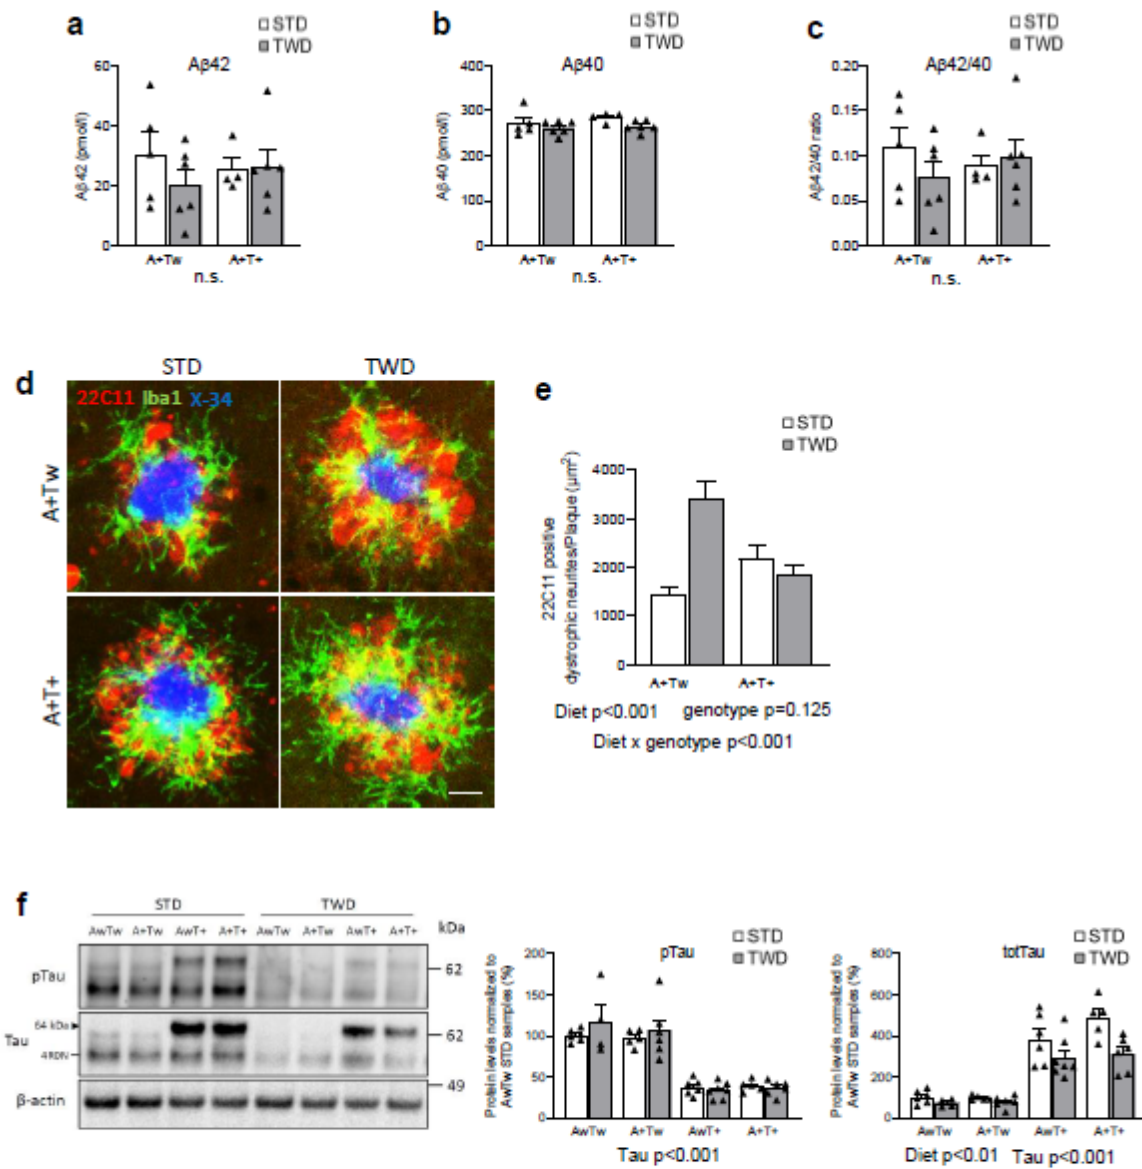

Supplementary Figure 1

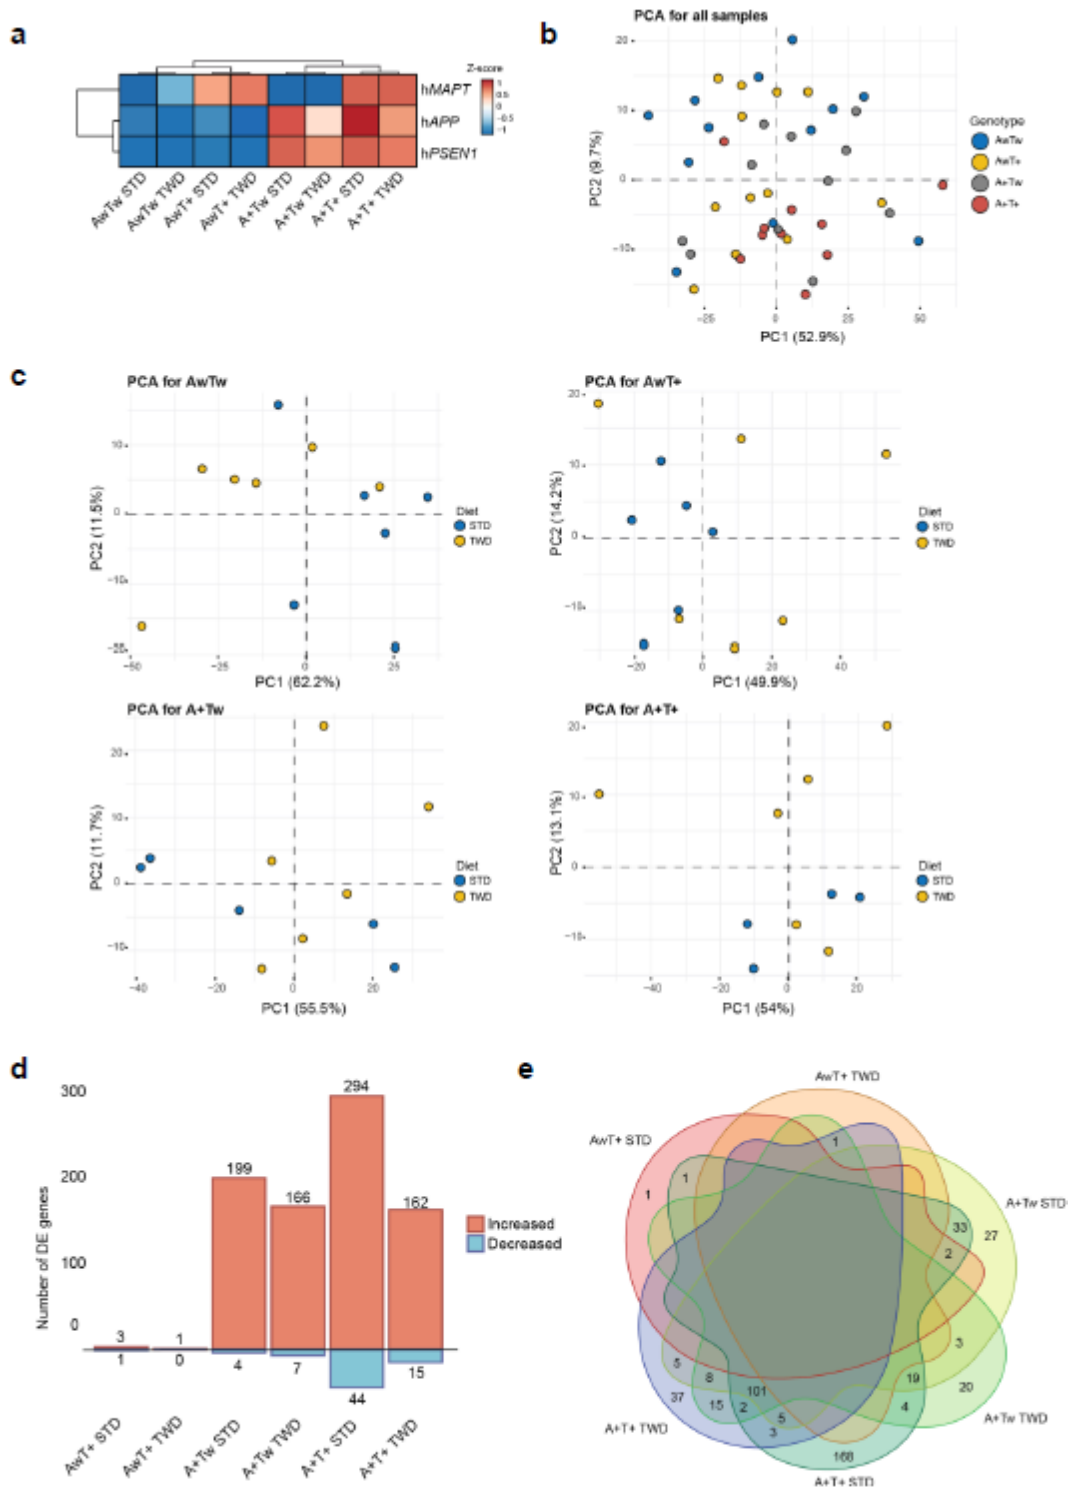

Supplement Figure 2



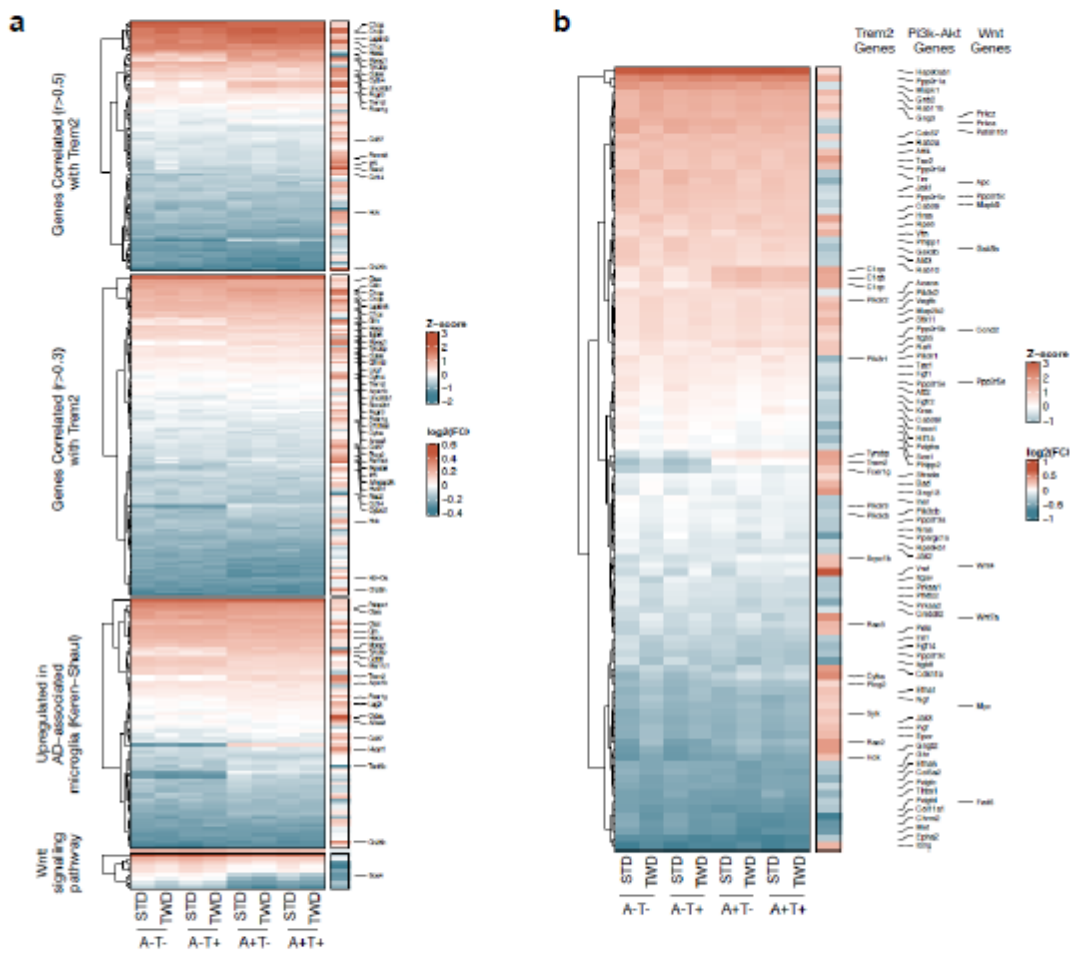

Supplementary Figure 4

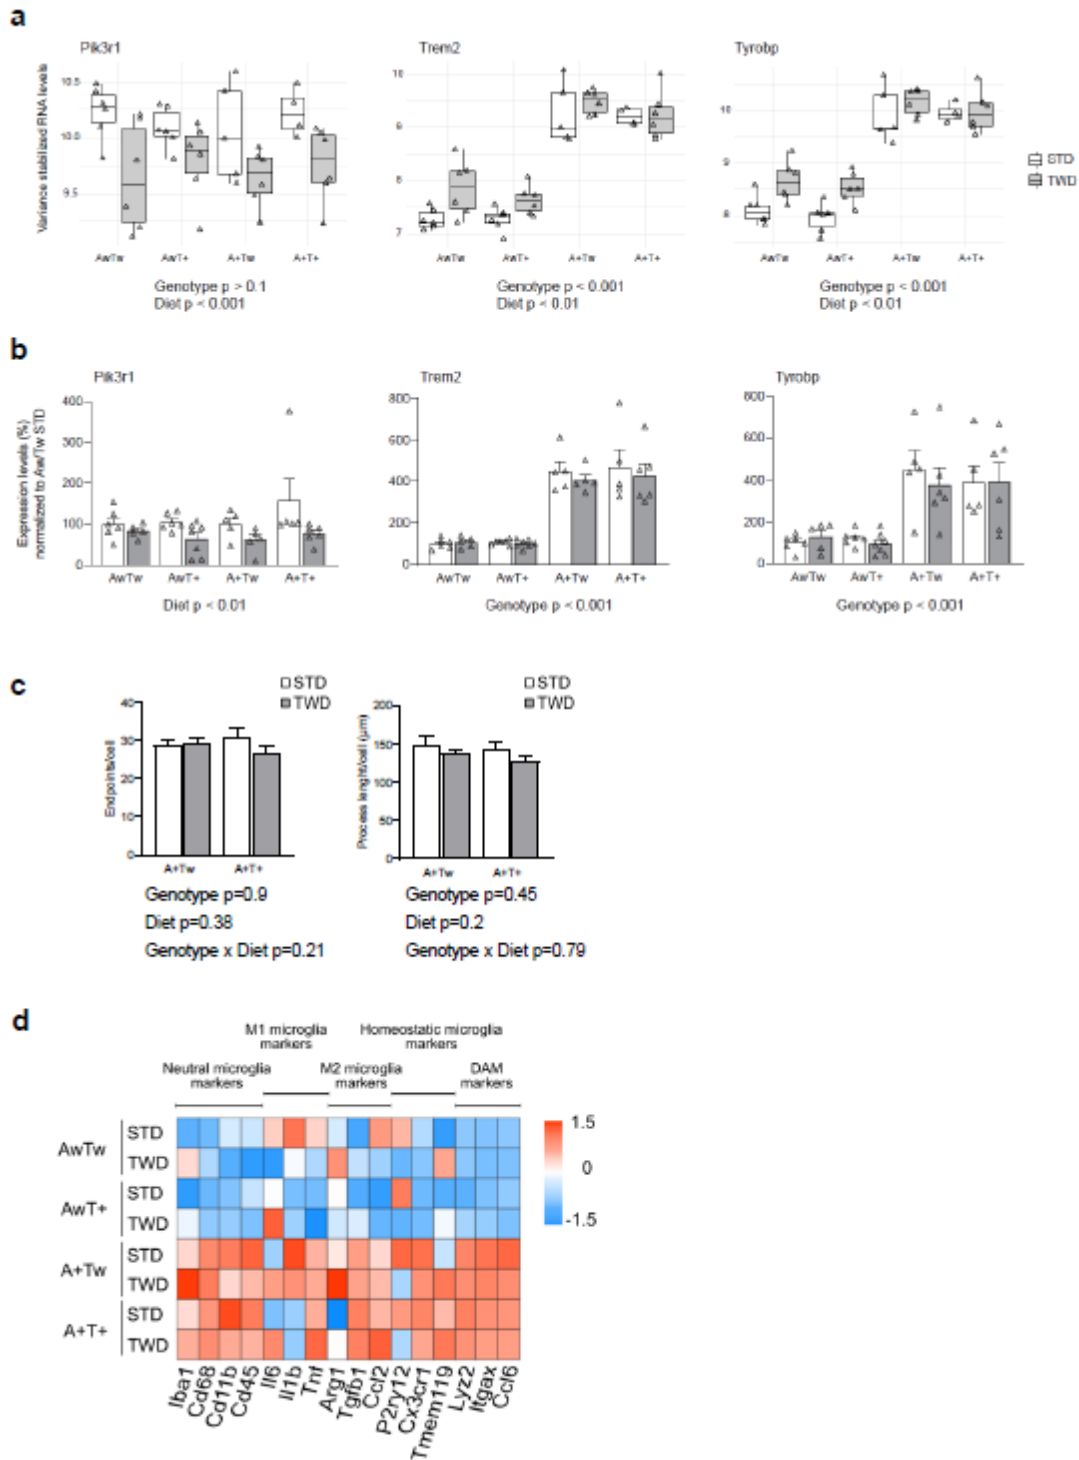

Supplement Figure 5

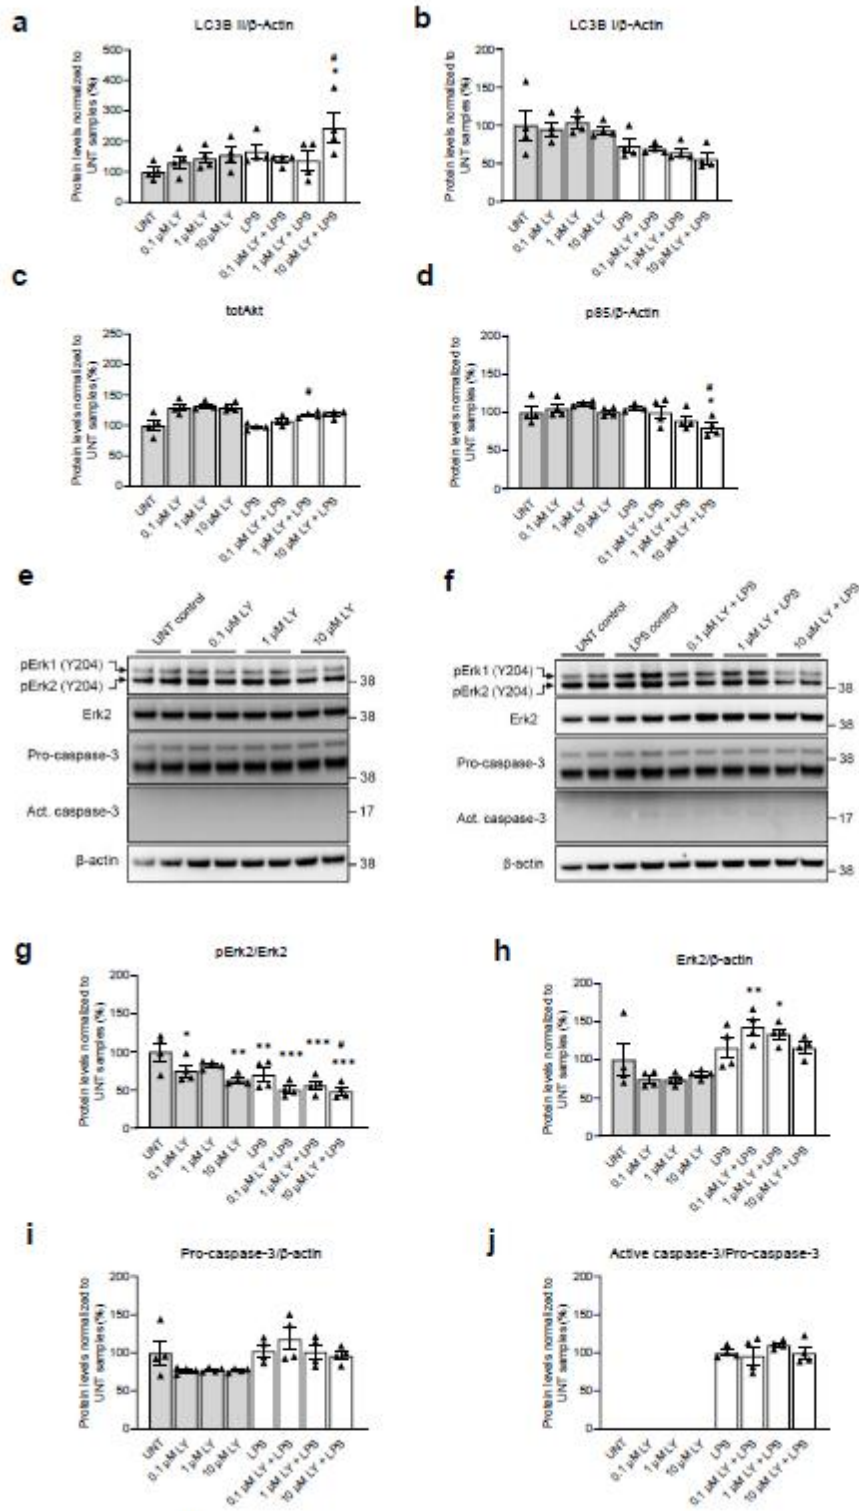

Supplement Figure 6
